# Supplementary material for: Impact of Campylobacter spp. on the Integrity of the Porcine Gut
Source: MDPI journal article supplement (doi:10.3390/ani11092742), 2021-09-19
Supplement: s1 [file s1]

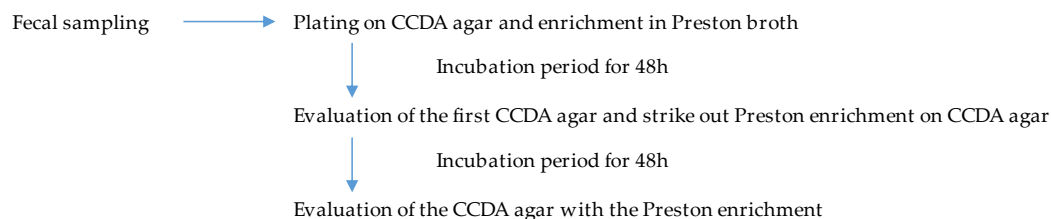

**Figure S1.** Microbiological procedure for the detection of *Campylobacter* spp. in the fecal samples of the test animals on modified charcoal cefoperazonedeoxycholate agar plates (CCDA).

**Table S1.** Ingredients of the nalidixic acid stock solution (1%).

| Chemicals                        | Amount of Substance in the Solution |
|----------------------------------|-------------------------------------|
| Nalidixin acid                   | 1.0 g                               |
| Sodium hydroxide (NaOH, 1 mol/l) | 6.0 ml                              |
| double distilled water           | fill up to 100 ml                   |

**Table S2.** Ingredients of the streptomycin stock solution (1%).

| Chemicals              | Amount of Substance in the Solution |
|------------------------|-------------------------------------|
| Streptomycin sulphate  | 1.0 g                               |
| double distilled water | fill up to 100 ml                   |

**Table S3.** Quantity ratio for the preparation of the specific antibiotics-CCDA agar with the respective stock solution (nalidixic acid or streptomycin sulphate).

| Chemicals                                                              | Amount of Substance in the Solution |
|------------------------------------------------------------------------|-------------------------------------|
| CCDA selective Supplement SR0155E <sup>1</sup>                         | 1 unit                              |
| Campylobacter agar base CM0739B <sup>1</sup>                           | 22.75 g                             |
| double distilled water                                                 | 500 ml                              |
| nalidixic acid stock solution (1%) or streptomycin stock solution (1%) | 5 ml                                |

<sup>1</sup> Thermo Scientific Inc., Waltham, MA, USA.

**Table S4.** Body temperature of the infection groups over the experimental period as mean  $\pm$  standard deviation (Group 0:  $n = 11$ ; Group 1:  $n = 8$ ; Group 2:  $n = 10$ ; Group 3:  $n = 8$ ).

| Infection Group | Body temperature (°C) |
|-----------------|-----------------------|
| Group 0         | 39.53 $\pm$ 0.09      |
| Group 1         | 39.54 $\pm$ 0.08      |
| Group 2         | 39.59 $\pm$ 0.11      |
| Group 3         | 39.56 $\pm$ 0.16      |

**Table S5.**  $\Delta I_{sc}$  values for jejunal tissue, both basal values for the groups and the changes after addition of glucose and forskolin, the mean values and standard deviations for the respective groups (0–3) are shown (Group 0:  $n = 11$ ; Group 1:  $n = 8$ ; Group 2:  $n = 10$ ; Group 3:  $n = 8$ ).

| Infection Group | $\Delta I_{sc}$ basal ( $\mu E(cm^2h)^{-1}$ ) | $\Delta I_{sc}$ Glucose ( $\mu E(cm^2h)^{-1}$ ) | $\Delta I_{sc}$ Forskolin ( $\mu E(cm^2h)^{-1}$ ) |
|-----------------|-----------------------------------------------|-------------------------------------------------|---------------------------------------------------|
| Group 0         | 0.29 $\pm$ 0.16                               | 1.24 $\pm$ 0.84                                 | 1.99 $\pm$ 0.83                                   |
| Group 1         | 0.19 $\pm$ 0.25                               | 0.91 $\pm$ 0.84                                 | 1.72 $\pm$ 0.53                                   |
| Group 2         | 0.30 $\pm$ 0.31                               | 1.52 $\pm$ 1.23                                 | 2.57 $\pm$ 1.21                                   |
| Group 3         | 0.20 $\pm$ 0.13                               | 0.53 $\pm$ 0.31                                 | 1.88 $\pm$ 0.79                                   |

**Table S6.**  $\Delta I_{sc}$  values for caecal tissue, both basal values for the groups and the changes after addition of carbachol and forskolin, Table 0. are shown (Group 0:  $n = 11$ ; Group 1:  $n = 8$ ; Group 2:  $n = 10$ ; Group 3:  $n = 8$ ).

| Infection Group | $\Delta I_{sc}$ basal ( $\mu E(cm^2h)^{-1}$ ) | $\Delta I_{sc}$ Carbachol ( $\mu E(cm^2h)^{-1}$ ) | $\Delta I_{sc}$ Forskolin ( $\mu E(cm^2h)^{-1}$ ) |
|-----------------|-----------------------------------------------|---------------------------------------------------|---------------------------------------------------|
| group 0         | $0.17 \pm 0.31$                               | $0.43 \pm 0.22$                                   | $2.07 \pm 0.96$                                   |
| group 1         | $0.37 \pm 0.35$                               | $0.30 \pm 0.13$                                   | $1.27 \pm 0.53$                                   |
| group 2         | $0.71 \pm 0.47^1$                             | $1.12 \pm 0.63^1$                                 | $3.66 \pm 1.11^1$                                 |
| group 3         | $0.13 \pm 0.35$                               | $0.53 \pm 0.16$                                   | $0.63 \pm 1.07$                                   |

<sup>1</sup> These values differ significantly from those of group 0 ( $p \leq 0.05$ ).

**Table S7.**  $\Delta G_t$  values for jejunal epithelia, both basal values for the groups and the changes after addition of glucose and forskolin, the mean values and standard deviations for the respective groups (0–3) are shown (Group 0:  $n = 11$ ; Group 1:  $n = 8$ ; Group 2:  $n = 10$ ; Group 3:  $n = 8$ ).

| Infection Group | $\Delta G_t$ basal ( $mS\ cm^{-2}$ ) | $\Delta G_t$ glucose ( $mS\ cm^{-2}$ ) | $\Delta G_t$ forskolin ( $mS\ cm^{-2}$ ) |
|-----------------|--------------------------------------|----------------------------------------|------------------------------------------|
| Group 0         | $28.09 \pm 4.50$                     | $-2.37 \pm 2.43$                       | $-0.15 \pm 2.55$                         |
| Group 1         | $24.86 \pm 5.70$                     | $-1.50 \pm 2.16$                       | $-0.85 \pm 1.93$                         |
| Group 2         | $28.48 \pm 7.52$                     | $1.12 \pm 0.63$                        | $-0.60 \pm 1.17$                         |
| Group 3         | $20.98 \pm 5.68$                     | $-2.05 \pm 1.63$                       | $0.20 \pm 1.49$                          |

**Table S8.**  $\Delta G_t$  values for caecal epithelia, both basal values for the groups and the changes after addition of carbachol and forskolin, the mean values and standard deviations for the respective groups (0–3) are shown (Group 0:  $n = 11$ ; Group 1:  $n = 8$ ; Group 2:  $n = 10$ ; Group 3:  $n = 8$ ).

| Infection Group | $\Delta G_t$ basal ( $mS\ cm^{-2}$ ) | $\Delta G_t$ carbachol ( $mS\ cm^{-2}$ ) | $\Delta G_t$ forskolin ( $mS\ cm^{-2}$ ) |
|-----------------|--------------------------------------|------------------------------------------|------------------------------------------|
| Group 0         | $19.83 \pm 7.13$                     | $-0.83 \pm 1.23$                         | $-0.21 \pm 1.53$                         |
| Group 1         | $19.80 \pm 1.69$                     | $-0.14 \pm 0.64$                         | $-0.36 \pm 0.71$                         |
| Group 2         | $18.88 \pm 8.02$                     | $-0.29 \pm 1.18$                         | $1.59 \pm 1.30$                          |
| Group 3         | $19.82 \pm 7.77$                     | $-0.49 \pm 0.75$                         | $0.63 \pm 1.07$                          |
